# Supplementary material for: Establishment of ICU Mortality Risk Prediction Models with Machine Learning Algorithm Using MIMIC-IV Database
Source: MDPI journal article supplement (doi:10.3390/diagnostics12051068), 2022-04-24
Supplement: s1 [file s1]

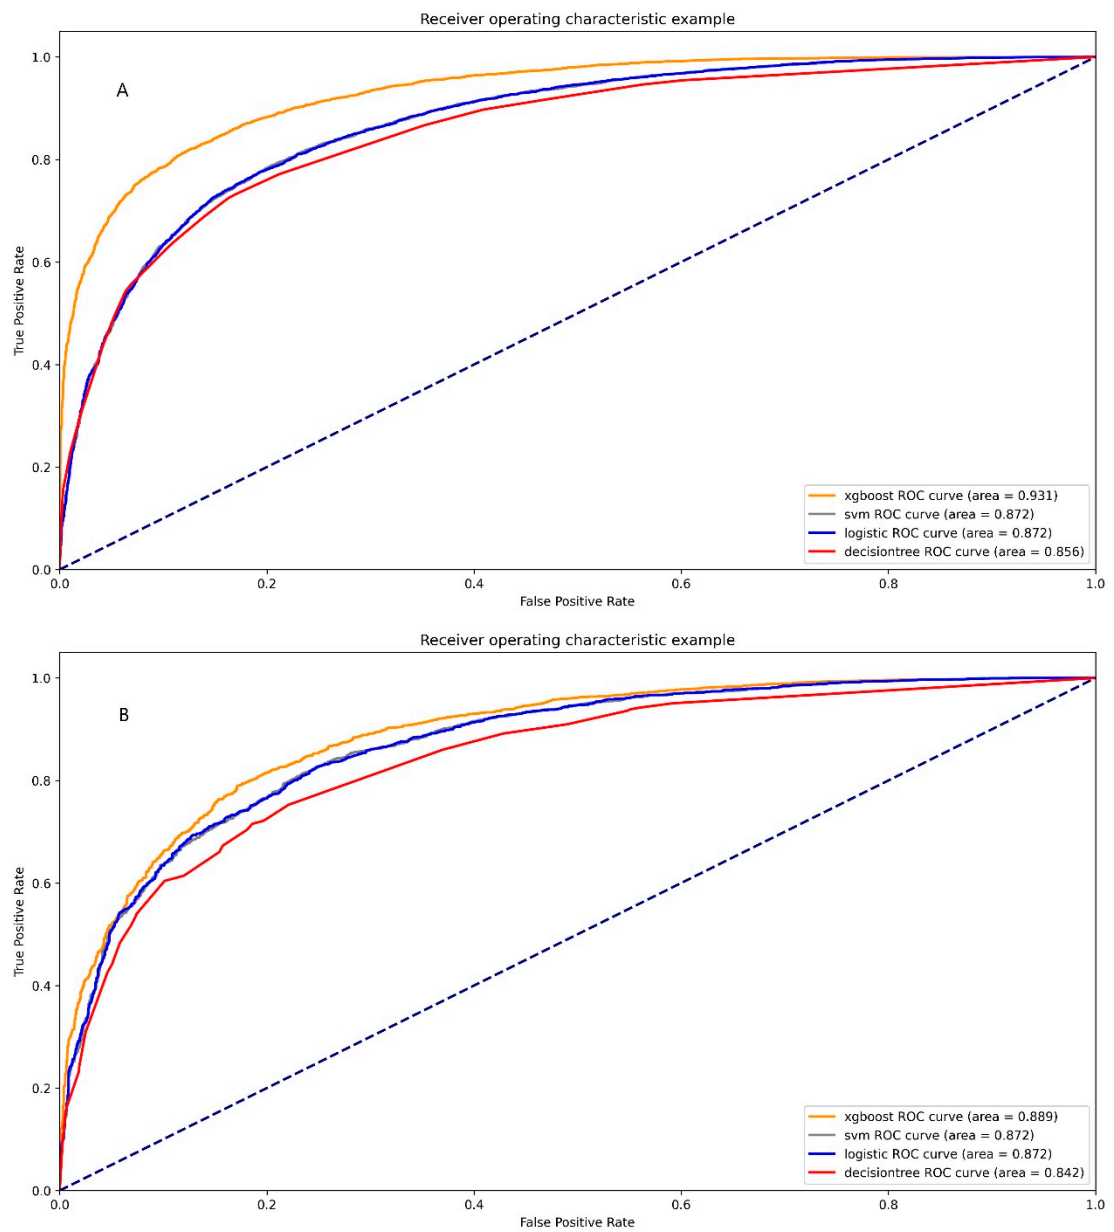

**Supplementary Figure S1** ROC curves of training dataset (A) and testing dataset (B)

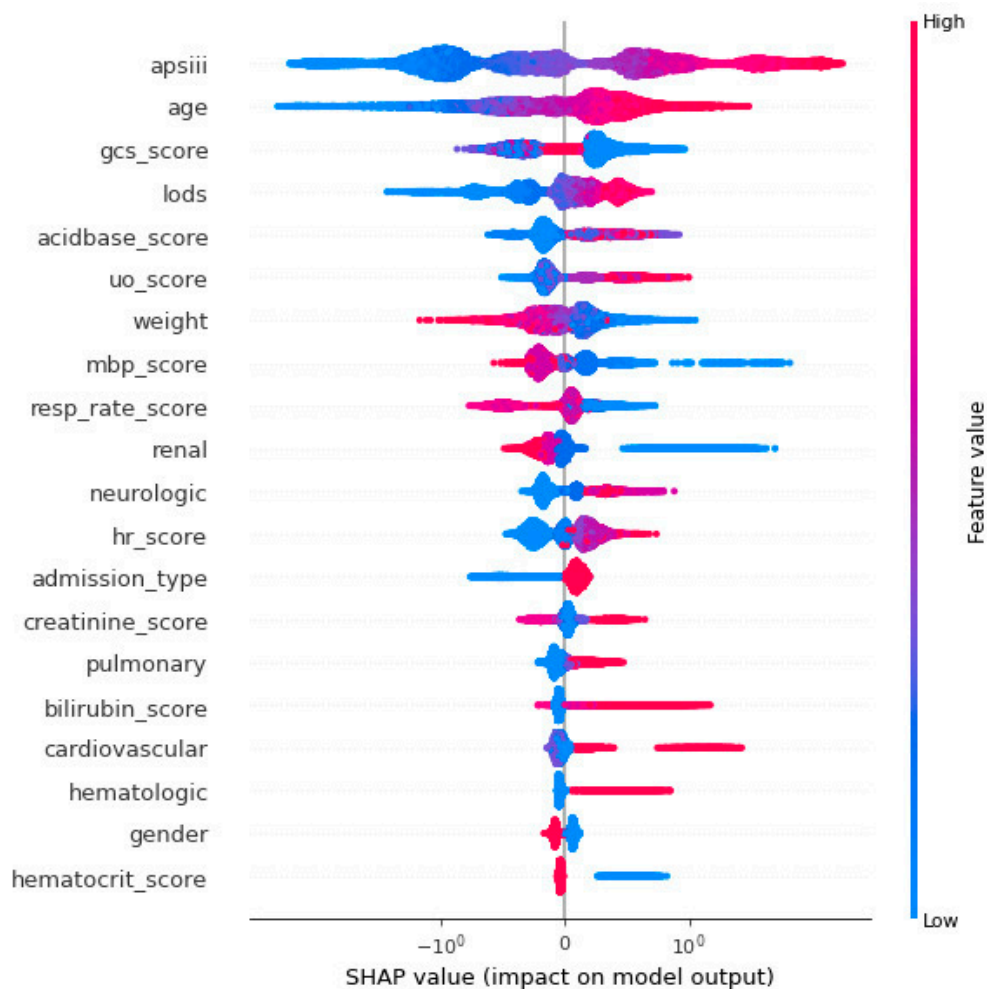

**Supplementary Figure S2** SHAP values importance of all features in the Xgboost model

**Supplement Table S1** Hyperparameter values of models

| Models              | Hyperparameters                                        | Values    |
|---------------------|--------------------------------------------------------|-----------|
| XGBoost             | Learning rate                                          | 0.1       |
|                     | Maximum tree depth                                     | 3         |
|                     | Minimum sum of instance weight                         | 1         |
|                     | The subsample ratio of columns                         | 0.8       |
|                     | Subsample                                              | 0.8       |
|                     | Number of trees                                        | 380       |
| SVM                 | Kernel                                                 | linear    |
|                     | Penalty parameter of the error term                    | 9         |
| Logistic Regression | Solver                                                 | liblinear |
|                     | Penalty                                                | L2        |
|                     | Maximum tree depth                                     | 5         |
| Decision Tree       | The minimum samples required to split an internal node | 2         |
|                     | The minimum samples required to be at a leaf node      | 10        |
